# Supplementary material for: Development of human cGAS-specific small-molecule inhibitors for repression of dsDNA-triggered interferon expression
Source: PubMed Central journal article supplement (PMC6529454; doi:10.1038/s41467-019-08620-4), 2019-05-21
Supplement: 41467_2019_8620_MOESM1_ESM.pdf [file 41467_2019_8620_MOESM1_ESM.pdf]

**Supplementary Information**

**Development of human cGAS-specific small-molecule inhibitors for repression of dsDNA-triggered interferon expression**

Lama et al.

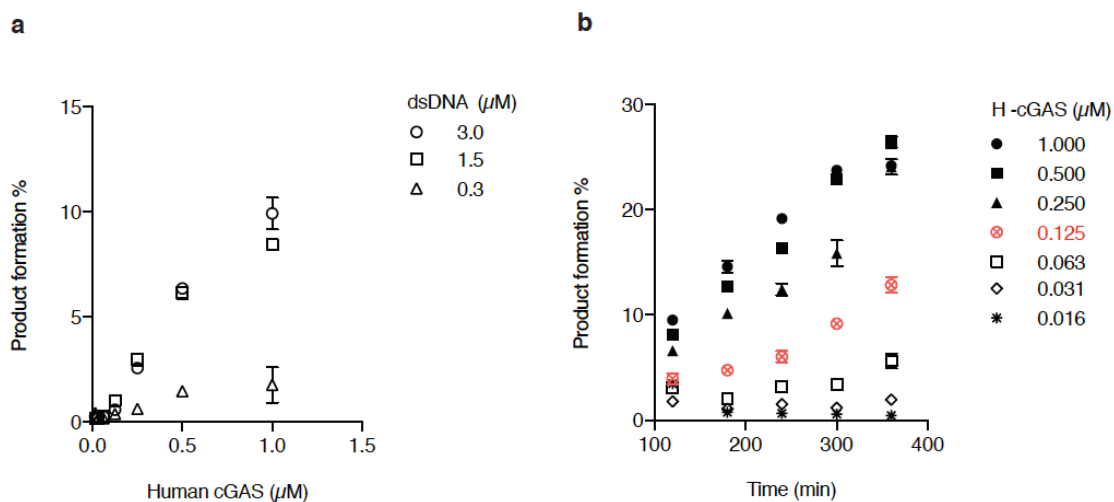

**Supplementary Figure 1** Development and optimization of luminescence based high throughput screening assay for human cGAS **(a)** Titration of h-cGAS at 3 different concentrations of 45-bp dsDNA. The reactions were performed for 120 min. **(b)** Time course analysis of h-cGAS activity using 50 nM 100-bp dsDNA, 300  $\mu\text{M}$  ATP, and 300  $\mu\text{M}$  GTP. The activity of cGAS enzyme was determined by calculating % cGAMP product formation using an RF-MS assay based on consumption of ATP and GTP, and the generation of cGAMP. ( $n = 3$ ; mean  $\pm$  S.D.)

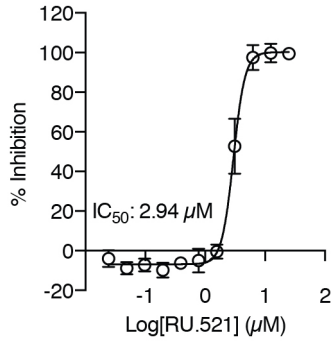

**Supplementary Figure 2** in vitro concentration response curve for RU.521 using recombinant h-cGAS. IC<sub>50</sub> value was determined for the inhibitor using RF-MS based assay. (*n* = 3; mean ± S.D.; Data shown are representation of two independent experiments.)

**a**

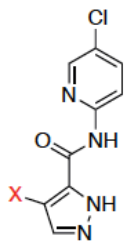

| Molecule ID | X                 | h-cGAS IC <sub>50</sub><br>( $\mu$ M) | m-cGAS IC <sub>50</sub><br>( $\mu$ M) |
|-------------|-------------------|---------------------------------------|---------------------------------------|
| J001        | NO <sub>2</sub>   | 1.03                                  | 0.30                                  |
| J063        | CF <sub>3</sub>   | >25.0                                 | >25.0                                 |
| J064        | CN                | >25.0                                 | >25.0                                 |
| J065        | COOH              | >25.0                                 | >25.0                                 |
| J067        | CONH <sub>2</sub> | >25.0                                 | >25.0                                 |
| J006        | Cl                | >25.0                                 | >25.0                                 |
| J009        | CHO               | >25.0                                 | >25.0                                 |
| J008        | H                 | >25.0                                 | >25.0                                 |
| J007        | Me                | >25.0                                 | >25.0                                 |
| J069        | NH <sub>2</sub>   | >25.0                                 | 21.9                                  |

**b**

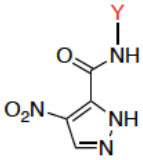

| Molecule ID | Y                                                                                   | h-cGAS IC <sub>50</sub><br>( $\mu$ M) | m-cGAS IC <sub>50</sub><br>( $\mu$ M) |
|-------------|-------------------------------------------------------------------------------------|---------------------------------------|---------------------------------------|
| J001        |    | 1.03                                  | 0.30                                  |
| J005        |   | >25.0                                 | 18.6                                  |
| J038        |  | 1.86                                  | 0.58                                  |
| J046        |  | 4.62                                  | 2.41                                  |
| J043        |  | 2.39                                  | 1.89                                  |
| J037        |  | 1.75                                  | 0.98                                  |
| J036        |  | 1.42                                  | 0.43                                  |

**Supplementary Figure 3 (a)** Evaluation of nitro group on pyrazole ring in **J001** through replacement with other functional groups. **(b)** Evaluation of pyridine ring in **J001** through replacement with other 6-membered rings.

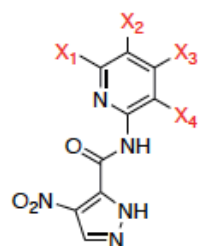

| Molecule ID | X <sub>1</sub> | X <sub>2</sub> | X <sub>3</sub> | X <sub>4</sub> | h-cGAS IC <sub>50</sub> (μM) | m-cGAS IC <sub>50</sub> (μM) |
|-------------|----------------|----------------|----------------|----------------|------------------------------|------------------------------|
| J106        |                | H              | H              | H              | >25.0                        | >25.0                        |
| J050        |                | H              | H              | H              | 10.2                         | 2.70                         |
| J047        |                | H              | H              | H              | 5.00                         | 1.70                         |
| J049        |                | H              | H              | H              | 6.28                         | 1.33                         |
| J044        |                | H              | H              | H              | 2.76                         | 0.65                         |
| J015        | H              |                | H              | H              | 0.20                         | 0.10                         |
| J025        | H              |                | H              | H              | 0.65                         | 0.39                         |
| J024        | H              |                | H              | H              | 0.59                         | 0.41                         |
| J001        | H              |                | H              | H              | 1.04                         | 0.49                         |
| J032        | H              |                | H              | H              | 0.84                         | 0.26                         |
| J014        | H              | H              |                | H              | 0.10                         | 0.06                         |
| J019        | H              | H              |                | H              | 0.23                         | 0.06                         |
| J021        | H              | H              |                | H              | 0.31                         | 0.08                         |
| J022        | H              | H              |                | H              | 0.38                         | 0.13                         |
| J031        | H              | H              |                | H              | 1.11                         | 0.28                         |
| J057        | H              | H              | H              |                | >25.0                        | 14.9                         |
| J054        | H              | H              | H              |                | >25.0                        | 16.3                         |
| J056        | H              | H              | H              |                | >25.0                        | 10.3                         |
| J053        | H              | H              | H              |                | >25.0                        | >25.0                        |

**Supplementary Figure 4** Evaluation of substituents on pyridine ring in **J001** through addition of different substituents on four available carbon positions on pyridine ring.

**a**

| Molecule ID | X | Y  | h-cGAS IC <sub>50</sub> (μM) | m-cGAS IC <sub>50</sub> (μM) |
|-------------|---|----|------------------------------|------------------------------|
| G001        |   | H  | 2.08                         | 0.44                         |
| G002        |   | H  | >25.0                        | >25.0                        |
| G004        |   | H  | >25.0                        | >25.0                        |
| G007        |   | H  | >25.0                        | >25.0                        |
| G008        |   | H  | >25.0                        | >25.0                        |
| G010        |   | H  | >25.0                        | >25.0                        |
| G014        |   | H  | >25.0                        | >25.0                        |
| G003        |   | Me | 2.41                         | 0.774                        |
| G009        |   |    | 13.9                         | 3.45                         |

**b**

| Molecule ID | X <sub>1</sub> | X <sub>2</sub> | X <sub>3</sub> | X <sub>4</sub> | h-cGAS IC <sub>50</sub> (μM) | m-cGAS IC <sub>50</sub> (μM) |
|-------------|----------------|----------------|----------------|----------------|------------------------------|------------------------------|
| G015        | Cl             | Cl             | H              | H              | 0.35                         | 0.028                        |
| G001        | Cl             | H              | Cl             | H              | 2.08                         | 0.44                         |
| G013        | Cl             | H              | H              | Cl             | 3.23                         | 0.67                         |
| G025        | Br             | Cl             | H              | H              | 0.203                        | 0.024                        |
| G028        | Cl             | Br             | H              | H              | 0.198                        | 0.032                        |
| G076        | Cl             | CN             | H              | H              | 13.5                         | 0.92                         |
| G078        | CN             | Cl             | H              | H              | 0.795                        | 0.043                        |
| G024        | Cl             |                | H              | H              | >25.0                        | 9.78                         |
| G026        |                | Cl             | H              | H              | 24.7                         | 0.70                         |

**Supplementary Figure 5 (a)** Evaluation of methoxy-propanone side chain on piperidine ring or indole amino group in **G001** through replacement with other side chains. **(b)**

Evaluation of chlorine substituents on indole ring in **G001** through replacement with different substituents on the indole ring.

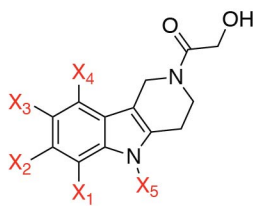

| Molecule ID | X <sub>1</sub> | X <sub>2</sub> | X <sub>3</sub> | X <sub>4</sub> | X <sub>5</sub> | h-cGAS IC <sub>50</sub> (μM) | m-cGAS IC <sub>50</sub> (μM) |
|-------------|----------------|----------------|----------------|----------------|----------------|------------------------------|------------------------------|
| G022        | Cl             | Cl             | H              | H              | H              | 0.106                        | 0.0180                       |
| G083        | Br             | Cl             | H              | H              | H              | 0.140                        | 0.0280                       |
| G085        | F              | Cl             | H              | H              | H              | 0.123                        | 0.0210                       |
| G090        | Me             | Cl             | H              | H              | H              | 0.295                        | 0.0350                       |
| G086        | Cl             | Br             | H              | H              | H              | 0.0450                       | 0.0150                       |
| G089        | Cl             | F              | H              | H              | H              | 0.296                        | 0.0750                       |
| G088        | Cl             | Me             | H              | H              | H              | 0.619                        | 0.0880                       |
| G097        | F              | Cl             | H              | H              | Me             | 0.138                        | 0.0128                       |
| G103        | Cl             | CN             | H              | H              | H              | 0.402                        | 0.0450                       |
| G092        | F              | Br             | H              | H              | H              | 0.0390                       | 0.0180                       |
| G105        | F              |                | H              | H              | H              | 1.45                         | 0.510                        |
| G100        | F              |                | H              | H              | H              | 15.8                         | 1.06                         |
| G101        | F              |                | H              | H              | H              | >25.0                        | 21.8                         |
| G102        | F              |                | H              | H              | H              | 19.0                         | 2.93                         |
| G084        | Me             | Me             | H              | H              | H              | 6.56                         | 0.445                        |
| G104        | CN             | CN             | H              | H              | H              | 8.32                         | 0.510                        |
| G098        | Cl             | Cl             | H              |                | H              | 0.0490                       | 0.0240                       |
| G108        | Cl             | Cl             | H              |                | H              | 0.0275                       | 5.15                         |
| G140        | Cl             | Cl             | H              |                | H              | 0.0140                       | 0.442                        |
| G150        | Cl             | Cl             | H              |                | H              | 0.0102                       | >25.0                        |

**Supplementary Figure 6** Evaluation of different substituents on indole ring in **G022**.



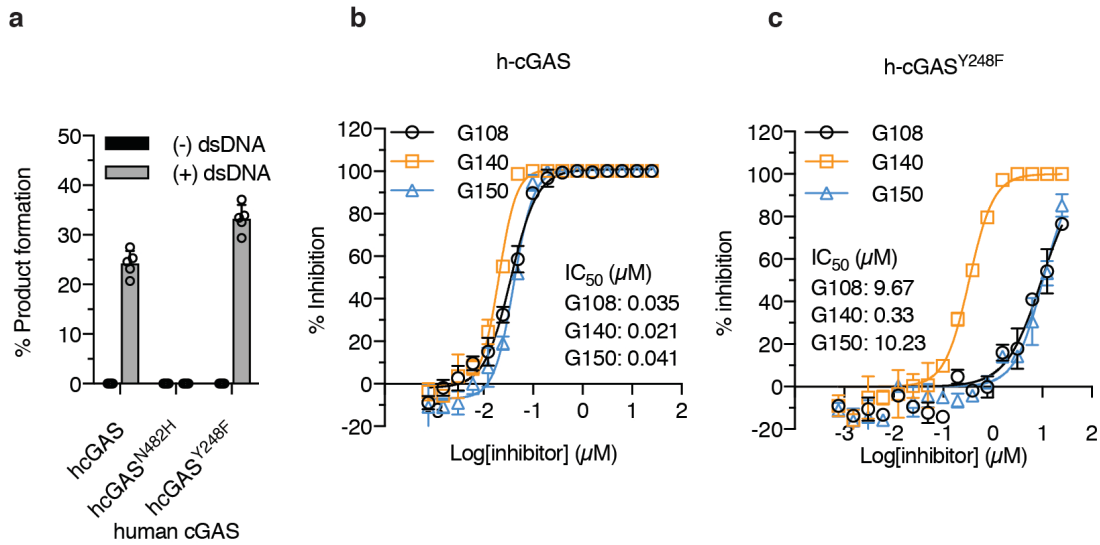

**Supplementary Figure 7** Human cGAS (h-cGAS) residue Tyr248 is important for inhibitors specificity. **(a)** Enzymatic activity of native human cGAS, h-cGAS<sup>N482H</sup>, and h-cGAS<sup>Y248F</sup>. **(b, c)** In vitro concentration response curves for **G108**, **G140**, and **G150** using native h-cGAS **(b)** or h-cGAS<sup>Y248F</sup> **(c)**. Enzymatic activity and IC<sub>50</sub> values were determined using RF-MS based assay. (*n* = 5 for **a**, 3 for **b** and 2 for **c**; mean ± S.D. Data shown are representation of two independent experiments.)

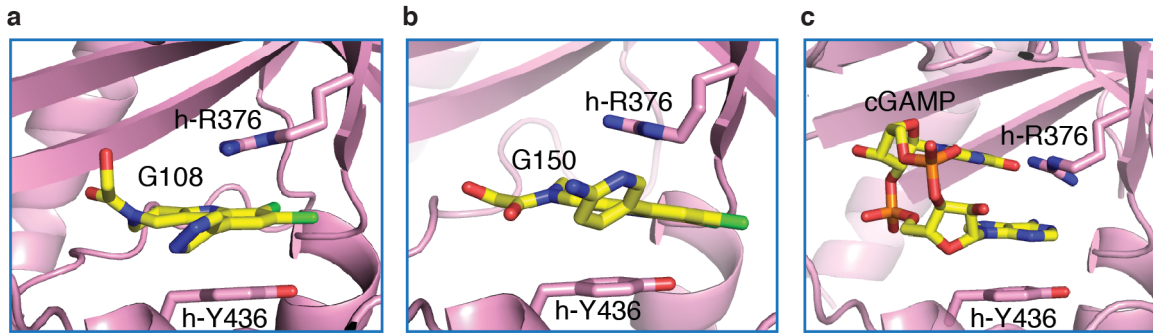

**Supplementary Figure 8** Comparison of the alignments of bound (a) **G108**, (b) **G150** and (c) **cGAMP** in the h-cGAS<sup>CD</sup> binding pocket. The side chains of Arg376 and Tyr436 are also included in the panels.

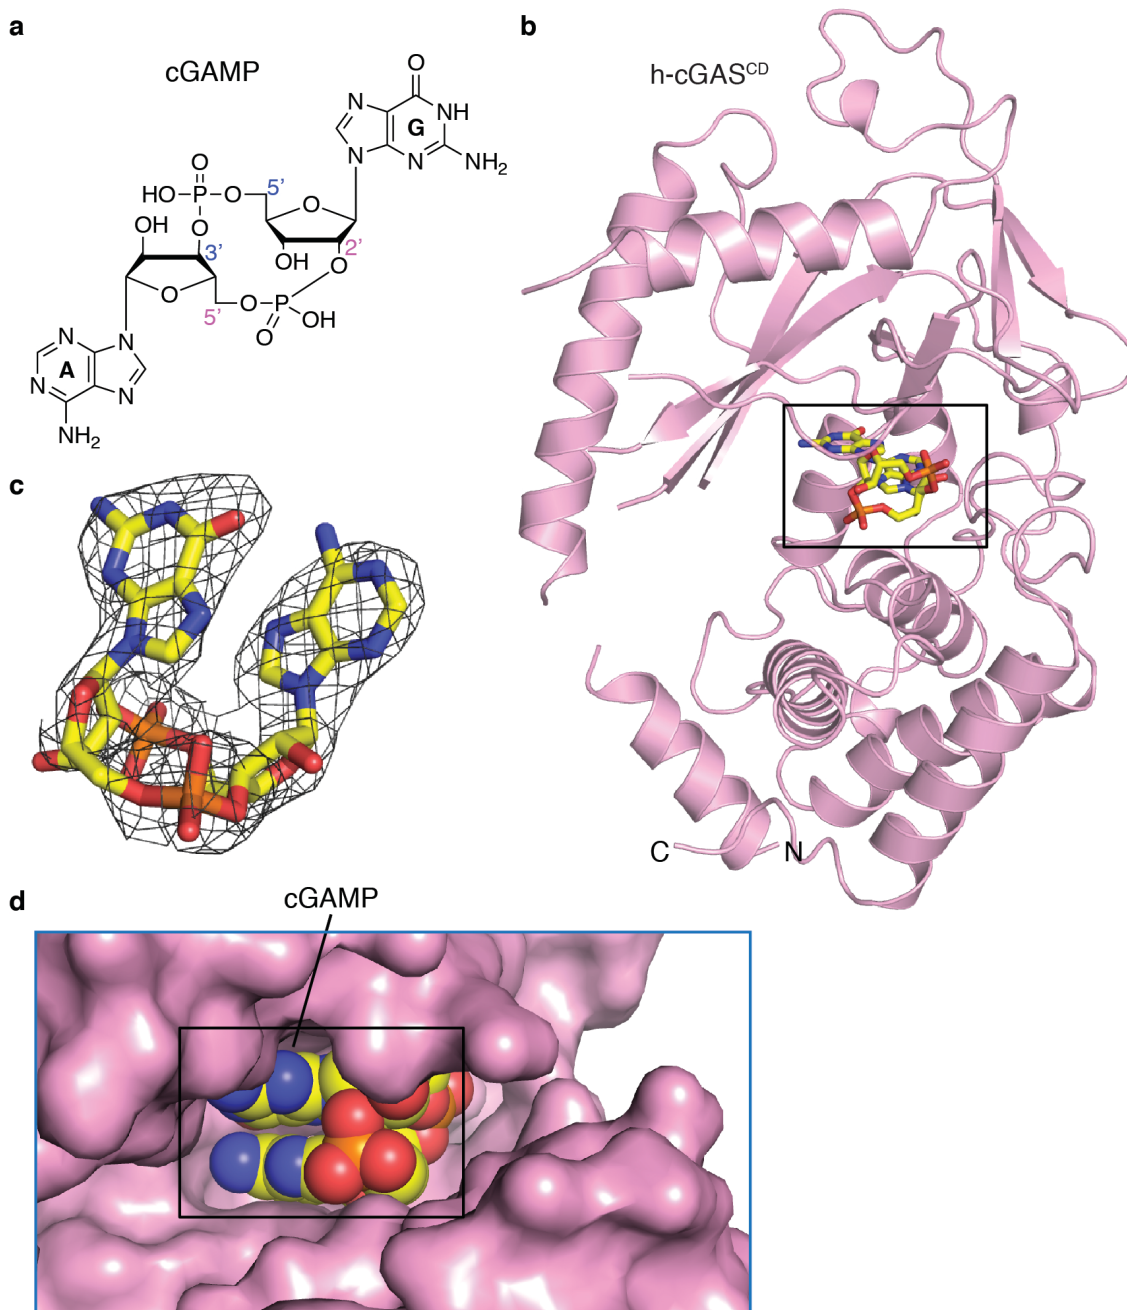

**Supplementary Figure 9** Structure of cGAMP bound to apo h-cGAS. **(a)** Chemical formula of cGAMP. **(b)** Crystal structure of cGAMP bound to apo h-cGAS<sup>CD</sup>. The bound cGAMP is shown in a stick representation and the binding pocket is boxed. **(c)** 2Fo-Fc

electron density map of bound cGAMP contoured at  $1.2 \sigma$ . **(d)** Positioning of the bound cGAMP towards one end of the extended ligand binding pocket of h-cGAS<sup>CD</sup>.

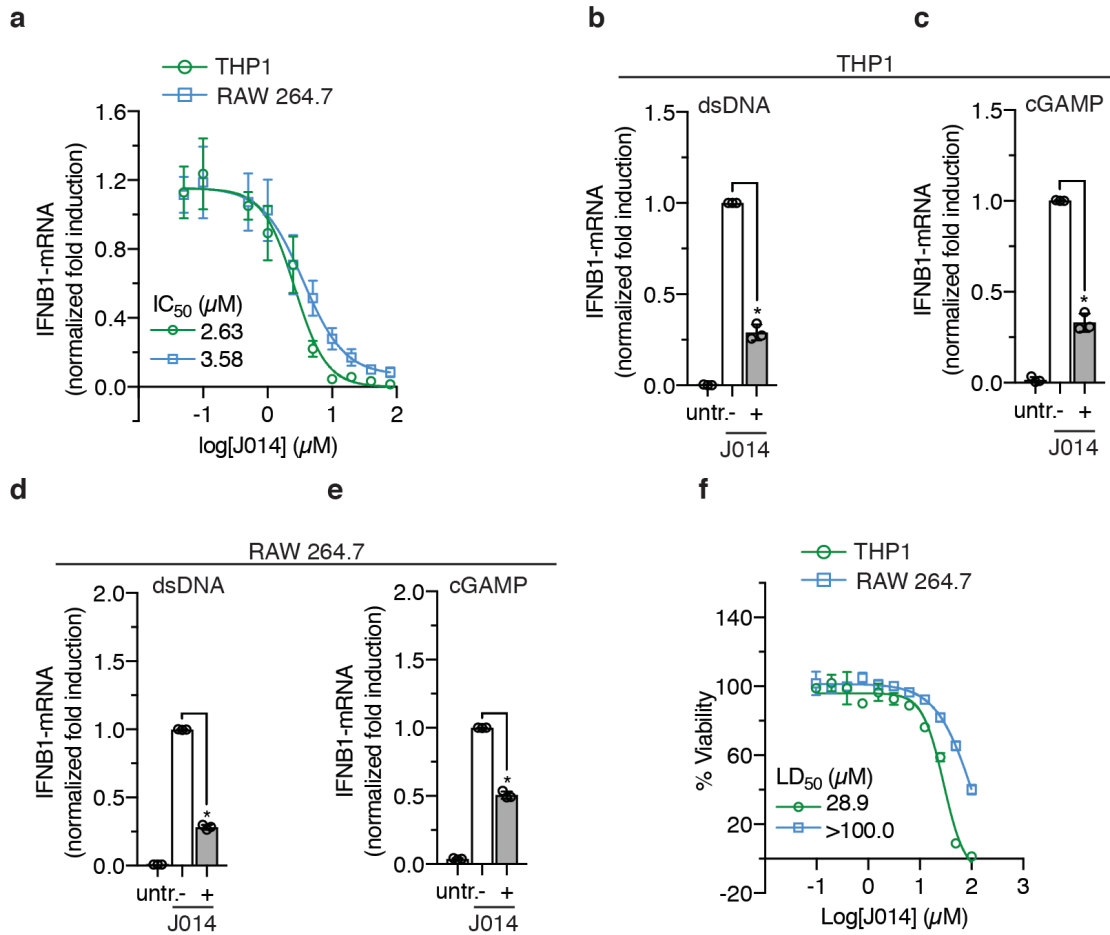

**Supplementary Figure 10** Inhibition of cGAS-dependent interferon induction by **J014** in human and murine macrophage cells. **(a)** Cellular inhibitory potency of **J014** against cGAS activity was tested in human THP1 or murine RAW 264.7 cells using dsDNA for cGAS stimulation. *IFNB1* mRNA was measured by qRT-PCR for each of the indicated inhibitor concentrations and normalized to no inhibitor control. **(b, c)** Specificity analysis of 5 μM **J014** against cGAS inhibition in THP1 cells using different ligands: 2 μg ml<sup>-1</sup> dsDNA (cGAS), and 10 μg ml<sup>-1</sup> cGAMP (STING). **(d, e)** Specificity analysis of 10 μM **J014** against cGAS inhibition in RAW 264.7 cells using different ligands: 2 μg ml<sup>-1</sup> dsDNA (cGAS), and 10 μg ml<sup>-1</sup> cGAMP (STING). Untr., untreated cells. **(f)** Cytotoxic

effect of **J014** was tested in THP1 and RAW 264.7 cells using different concentrations range. ( $n = 3$ ; mean  $\pm$  S.D.;  $*p < 0.001$ , using two-tailed Student's t-test in **b-e**. Data shown are representation of two independent experiments.)

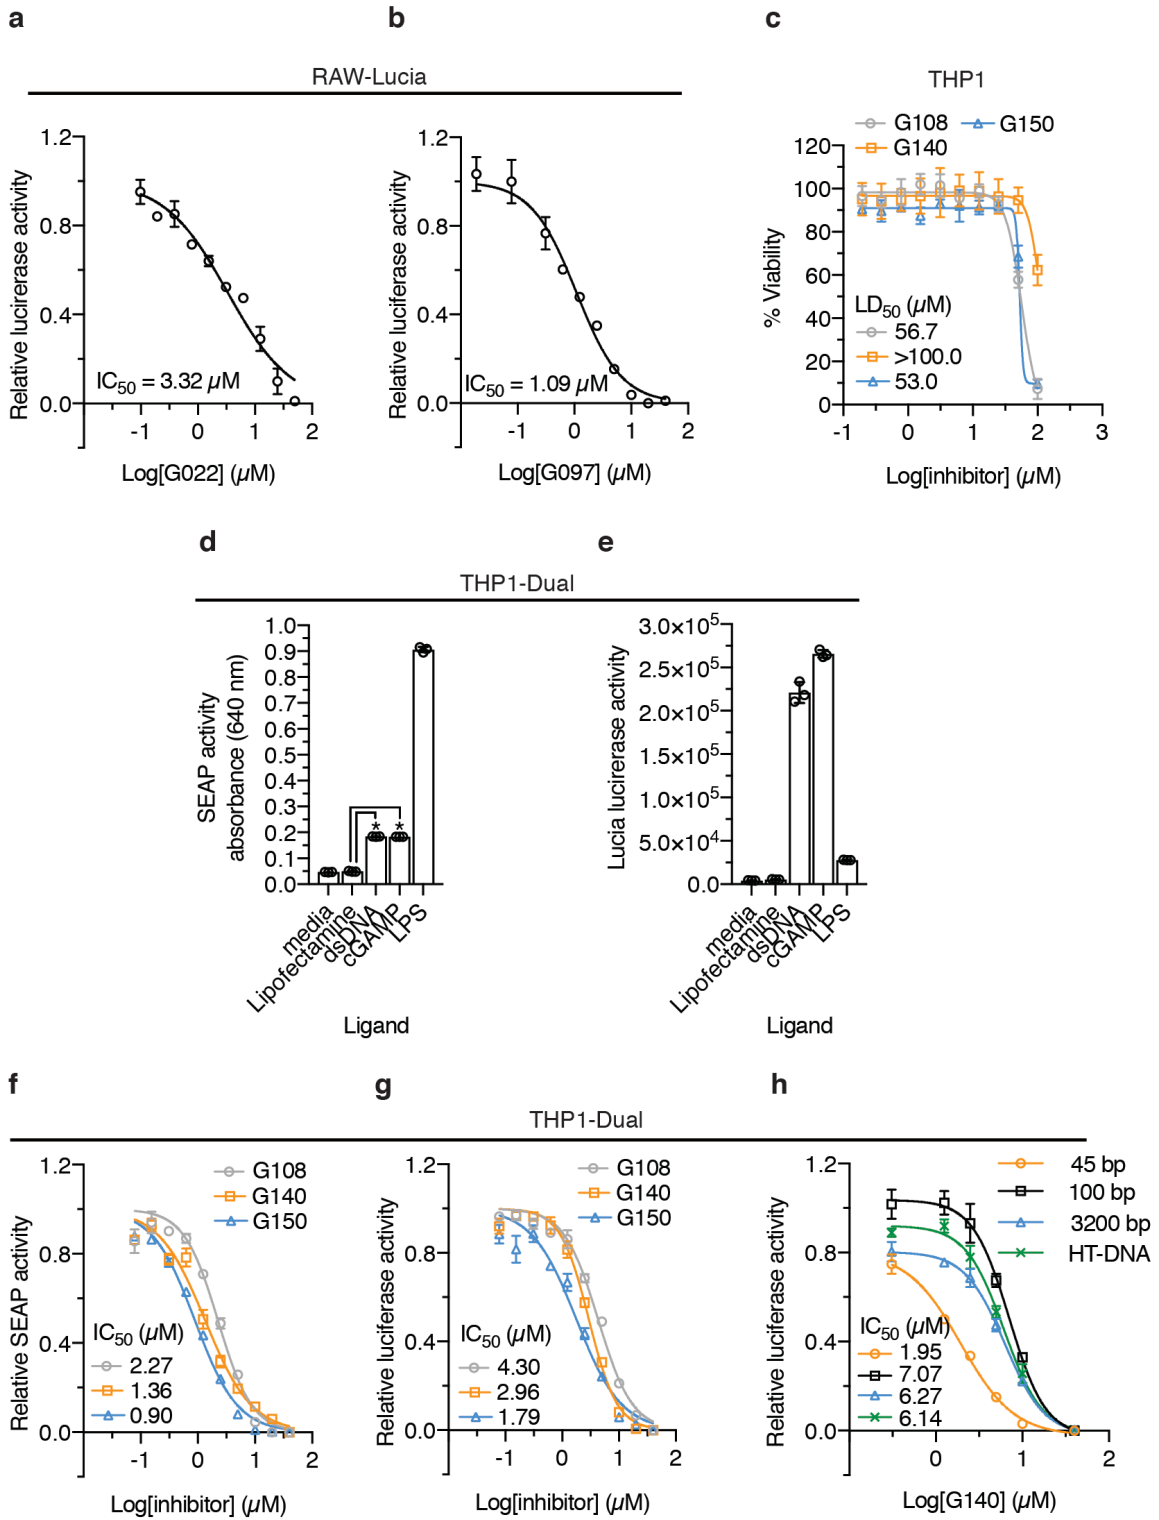

**Supplementary Figure 11** Cellular potency analyses of G chemotype cGAS inhibitors in human and murine macrophage cells. **(a, b)** Inhibition of dsDNA-stimulated activity of cGAS by **G022**, and **G097** were tested using a range of inhibitor concentrations in RAW-Lucia cells and measuring the inhibition of Lucia luciferase activity using Quanti-Luc reagent (InvivoGen). **(c)** Cytotoxic effect of **G108**, **G140**, and **G150** were tested in THP1 cells using different concentrations range. **(d, e)** Analysis of activation of NF- $\kappa$ B pathway **(d)** and interferon-inducible gene **(e)** were analyzed in THP1-Dual cells using different ligands: 0.5  $\mu\text{g ml}^{-1}$  dsDNA (cGAS), 2.5  $\mu\text{g ml}^{-1}$  cGAMP (STING), or 25  $\text{ng ml}^{-1}$  LPS (TLR4). **(f, g)** Inhibition of dsDNA-stimulated activity of cGAS by **G108**, **G140**, and **G150** were tested using a range of inhibitor concentrations in THP1-Dual cells and measuring the inhibition of SEAP activity using Quanti-Blue reagent (InvivoGen) **(f)** or the inhibition of Lucia luciferase activity using Quanti-Luc reagent **(g)**. **(h)** Potency of **G140** was tested in dsDNA-stimulated THP1-Dual cells in the presence of a range of different inhibitor concentrations using 0.5  $\mu\text{g ml}^{-1}$  of dsDNA ligands of different length or herring-testes DNA (HT-DNA). unr., cells treated only with Lipofectamine2000 transfection reagent. Relative luciferase activity or relative SEAP activity were determined with respect to dsDNA stimulated cell samples with no inhibitor control. The cellular  $\text{IC}_{50}$  values and  $\text{LD}_{50}$  values were calculated using GraphPad Prism (7.01). ( $n = 2$  for **a** and **b**, 3 for **c-h**; mean  $\pm$  S.D.;  $*p < 0.001$ , using one-way ANOVA followed by Tukey's test for multiple comparison **(d)**. Data shown are representation of two independent experiments.)



**a**

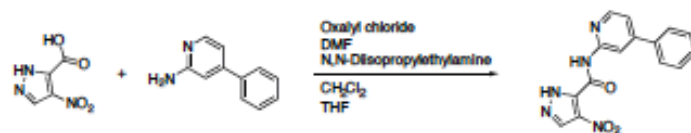

**b**

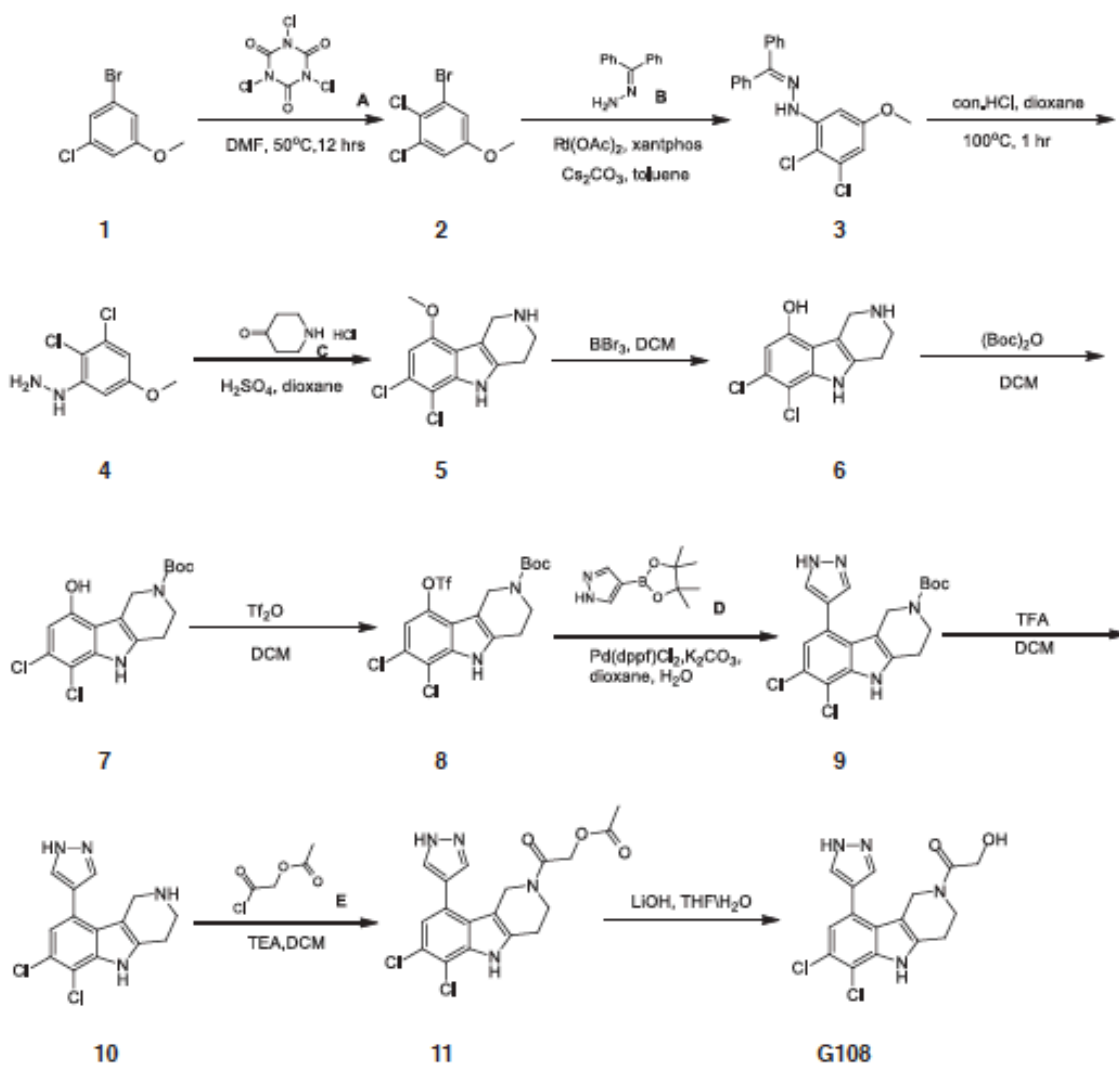

**Supplementary Figure 12** Chemical synthesis schemes depicting syntheses of **J014** (a) and **G108** (b).

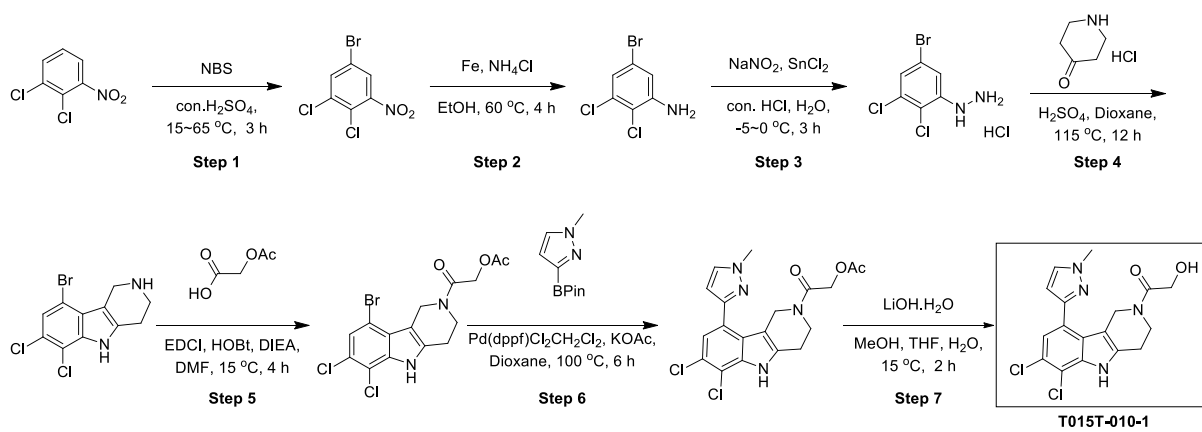

**Supplementary Figure 13** Chemical synthesis scheme depicting synthesis of **G140** (T015T-010-1).

| Category | Parameter                                                                                                                                                                     | Description                                                                                                                                                                                                                                                                                                                                                                                                                                                                                                                                                                                                                                                                                                                                                                                                                                                                                                 |
|----------|-------------------------------------------------------------------------------------------------------------------------------------------------------------------------------|-------------------------------------------------------------------------------------------------------------------------------------------------------------------------------------------------------------------------------------------------------------------------------------------------------------------------------------------------------------------------------------------------------------------------------------------------------------------------------------------------------------------------------------------------------------------------------------------------------------------------------------------------------------------------------------------------------------------------------------------------------------------------------------------------------------------------------------------------------------------------------------------------------------|
| Assay    | Type of assay<br>Target<br>Primary measurement<br>Key reagents<br>Assay protocol<br><br>Additional comment                                                                    | Purified enzyme assay<br>Human Cyclic GMP-AMP Synthase (h-cGAS)<br>Luminescence<br>h-cGAS, ATP, GTP, dsDNA<br>20 $\mu$ L final volume: Buffer of the reaction containing 20 mM Tris-HCl pH 7.4, 150 mM NaCl, 5mM MgCl <sub>2</sub> , 1mM DTT, 1 $\mu$ M ZnCl <sub>2</sub> and 0.01% Tween-20. Samples contains buffer of the reaction, 100 $\mu$ M ATP and GTP, 25 nM dsDNA and 100 nM h-cGAS incubated for 7 hours at room temperature. The reaction was stopped with 20 $\mu$ L of Kinase-Glo <sup>®</sup> Max Luminescent Kinase Assay. Luminescence was measured in a Biotek Synergy Neo plate reader. Order of addition: 10 $\mu$ L of reaction buffer, 0.05 $\mu$ L compounds, 5 $\mu$ L of a mix of ATP, GTP and dsDNA (columns 1-23), 5 $\mu$ L of a reaction containing ATP, GTP (column 24), 5 $\mu$ L solution containing h-GAS (full plate). The plates were spun down for 30 seconds at 100xg. |
| Library  | Library size<br>Library composition<br><br>Source<br><br>Additional comments                                                                                                  | 281,348 pure compounds<br>Low molecular weight compounds were a random subset from the Rockefeller University Compound Library of 283,000 compounds<br>Analyticon, Biofocus, Cerep, Chembridge, ChemDiv, ChemX-Infinity, NIH Clinical Collection, Edelris, Enamine, Greenpharma, NIH Small Molecule Repository, LifeChem, NIH Clinical Collection, Pharmakon-900, Prestwick, Selleckchem, Specs, Spectrum Chemicals and Tocris.<br>Library description at <a href="http://www.rockefeller.edu/htsrc/">www.rockefeller.edu/htsrc/</a>                                                                                                                                                                                                                                                                                                                                                                        |
| Screen   | Format<br>Concentration tested<br>Plate controls<br>Reagent/compound dispensing system<br>Detection instrument and software<br>Assay Validation /QC<br><br>Correction factors | 384-well plate<br>12.5 $\mu$ M; 0.25% DMSO<br>DMSO (negative control), no dsDNA (positive control)<br>MultiDrop Combi with RapidStack (Thermo Scientific) for reagents; Janus Automated Workstation with Nanohead (Perkin-Elmer) for compounds.<br>Biotek Synergy Neo plate reader, Biotek, Gen5.<br><br>Hit-compounds were re picked from the original 5 mM source and retested at 10 serial diluted concentrations; in triplicate and a concentration                                                                                                                                                                                                                                                                                                                                                                                                                                                     |

|                   |                                                                                                                                         |                                                                                                                                                                                                                                                                                                                                                                                                                                                                                                                                                                                                                                                                                                                                                                     |
|-------------------|-----------------------------------------------------------------------------------------------------------------------------------------|---------------------------------------------------------------------------------------------------------------------------------------------------------------------------------------------------------------------------------------------------------------------------------------------------------------------------------------------------------------------------------------------------------------------------------------------------------------------------------------------------------------------------------------------------------------------------------------------------------------------------------------------------------------------------------------------------------------------------------------------------------------------|
|                   | <p>Normalization data</p> <p>Additional comments</p>                                                                                    | <p>response curved fitted to a 4 parameter hyperbolic using CDD software. HPLC performed to all hits compounds to detect purity.</p> <p>none</p> <p>The % of inhibition is calculated as follow: % inhibition = 100 x [(sample - average negative control)/(average positive control – average negative control)].</p> <p>The quality of the screen was assessed by Z' factor calculated as follows: <math>Z' = 1 - [3 * (\text{standard deviation positive control} + \text{standard deviation negative control}) / (\text{average positive control} - \text{average negative control})]</math>.</p> <p>To determine the percentage of inhibition of h-cGAS the data was normalized against the positive control (column 24) and negative control (column 23).</p> |
| Post-HTS analysis | <p>Hit criteria</p> <p>Hit rate</p> <p>Additional assays</p> <p>Confirmation of hit purity and structure</p> <p>Additional comments</p> | <p>Normalized percentage of inhibition <math>\geq 40\%</math></p> <p>0.08%</p> <p>RapidFire Mass Spectrometry</p> <p>LC-MS; powders re-ordered and independently synthesized and re-tested in concentration –response curves</p> <p>All hits compounds reported were at least 85% pure by LC-MS.</p>                                                                                                                                                                                                                                                                                                                                                                                                                                                                |

**Supplementary Table 1.** h-cGAS high throughput small molecule screening data summary.

| Molecule name            | SMILES                                                                       | Vendor                   | h-cGAS IC <sub>50</sub> (μM) | m-cGAS IC <sub>50</sub> (μM) |
|--------------------------|------------------------------------------------------------------------------|--------------------------|------------------------------|------------------------------|
| RU-0131894               | <chem>CCN1CCC2=C(C1)SC(NC(=O)CC)=C2C1=NC2=CC=CC=C2S1</chem>                  | ChemDiv, Inc.            | 0.965                        | 7.51                         |
| <b>RU-0179423 (J001)</b> | <chem>[O-][N+](=O)C1=C(NN=C1)C(=O)NC1=NC=C(C1)C=C1</chem>                    | Vitas-M Laboratory, Ltd. | 0.976                        | 0.972                        |
| RU-0006086               | <chem>FC(F)(F)C1=CC(=O)N2C3=C(NC2=C1C#N)C=CC=C3</chem>                       | Vitas-M Laboratory, Ltd. | 1.05                         | 17.9                         |
| RU-0168658               | <chem>FC(F)(F)C1=NN2C(NC(CC3=CC=CC=C3)=CC2=O)=C1C1=CC=C<br/>C=C1</chem>      | Vitas-M Laboratory, Ltd. | 1.13                         | > 50.0                       |
| RU-0187170               | <chem>NC(=O)N1C(O)=C(C(=O)C2=CC=CS2)C2=CC(C1)=CC=C12</chem>                  | Tocris Bioscience        | 1.31                         | 21.5                         |
| RU-0187094               | <chem>CC1=C(C)C2=C(C=C1)C(=O)C1=CC=CC=C1N2CCCN</chem>                        | Tocris Bioscience        | 1.61                         | 10.3                         |
| RU-0005637               | <chem>FC(F)(F)C1=NC2=CC(C1)=CC(C1)=C2N1</chem>                               | Vitas-M Laboratory, Ltd. | 2.39                         | > 50.0                       |
| RU-0166197               | <chem>C1C1=CC=C2C(=C1)N=CC=C2N1C=CN=C1</chem>                                | Vitas-M Laboratory, Ltd. | 2.64                         | 10.8                         |
| <b>RU-0273458 (G001)</b> | <chem>COCC(=O)N1CCC2=C(C1)C1=CC(C1)=CC(C1)=C1N2</chem>                       | ENAMINE Ltd.             | 2.75                         | 1.14                         |
| RU-0010201               | <chem>OC(=O)CN1C(=S)S\C(=C\C2=C(O)C(Br)=CC(=C2)[N+](<br/>[O-])=O)C1=O</chem> | ChemBridge Corporation   | 3.02                         | 5.77                         |
| RU-0209189               | <chem>COC(=O)C1=NN2C(N1)=NS(=O)(=O)C1=CC=CC=C21</chem>                       | ENAMINE Ltd.             | 3.04                         | 3.93                         |
| RU-0020238               | <chem>OC(=O)C1=CC=CC=C1C1=CC=C(O1)\C=C1/SC(=S)NC1=O</chem>                   | Vitas-M Laboratory, Ltd. | 3.78                         | 9.65                         |
| RU-0183726               | <chem>C1C1=C(C1)C(NC(=O)C(C#N)C(=O)\C=C\C2=NC=CS2)=CC=C1</chem>              | ENAMINE Ltd.             | 4.63                         | 17.3                         |
| RU-0142869               | <chem>CNC(=O)CSC1=NC(=O)N2N=C(C)C(=C2N1)C1=CC=CC=C1</chem>                   | Life Chemicals Inc.      | 4.78                         | > 50.0                       |
| RU-0169289               | <chem>OC1=CC=C(\C=C2\C(=N)N3N=C(SC3=NC2=O)C2=C(C1)C=CC=C<br/>2)C=C1</chem>   | Vitas-M Laboratory, Ltd. | 5.18                         | 14.9                         |
| RU-0166710               | <chem>O=C1N(NC(=C1\C=N/C1CC1)C1=CC=CC=C1)C1=NC2=CC=CC=<br/>C2S1</chem>       | Specs                    | 5.27                         | > 50.0                       |
| RU-0172034               | <chem>CSC(=S)N\N=C(/C1=CC=CC=C1)C1=NC=CC=C1</chem>                           | Life Chemicals Inc.      | 7.02                         | > 50.0                       |
| RU-0003433               | <chem>C1C1=C(SC2=CC=CC=C12)C1=NNC(=S)O1</chem>                               | Vitas-M Laboratory, Ltd. | 7.16                         | 16.1                         |
| RU-0208705               | <chem>CC1=CC=C(C=C1)N1NC(=CC1=O)C(=O)NC1=CC=NC2=CC=NN<br/>12</chem>          | ENAMINE Ltd.             | 7.82                         | > 50.0                       |
| RU-0002019               | <chem>C1C1=C(C1)C(C1)=C2NC(=O)OC2=C1</chem>                                  | ChemDiv, Inc.            | 8.1                          | 11.6                         |
| RU-0001026               | <chem>OC(=O)CC1=CC(I)=C(OC2=CC(I)=C(O)C(I)=C2)C(I)=C1</chem>                 | Vitas-M Laboratory, Ltd. | 11.9                         | 29.2                         |
| RU-0166755               | <chem>CCC\N=C/C1=C(NN(C1=O)C1=NC2=CC=CC=C2S1)C1=CC=CC=<br/>C1</chem>         | Specs                    | 12.8                         | > 50.0                       |
| RU-0010562               | <chem>OC1=C2N=C(NC3=CC=CC=N3)C=CC2=CC=C1</chem>                              | ChemDiv, Inc.            | 13.2                         | > 50.0                       |
| RU-0208404               | <chem>OC1=CC=CN=C1NC(=O)C1=C2CCCCN2C(=N1)C1=CC=CC=C<br/>1</chem>             | ENAMINE Ltd.             | 13.7                         | > 50.0                       |
| RU-0093754               | <chem>CC1=C2C(CCC3=C2C=CC=C3)=NC2=CC3=C(OCO3)C=C12</chem>                    | ENAMINE Ltd.             | 23.1                         | > 50.0                       |
| RU-0182153               | <chem>OC1=CC=CC=C1C1=NNC2(CC3CC2C2CCCC32)S1</chem>                           | Vitas-M Laboratory, Ltd. | 33.1                         | > 50.0                       |
| RU-0171678               | <chem>COCC1=NN2C(NC(CC3=CC=CC=C3)=CC2=O)=C1C1=CC=CC=<br/>C1</chem>           | Vitas-M Laboratory, Ltd. | > 50.0                       | > 50.0                       |

**Supplementary Table 2.** Re-evaluation of freshly sourced non-intercalating compounds selected with IC<sub>50</sub> < 10 μM in ATP-coupled luminescence assay and HPLC-MS measured purity of ≥ 85%. IC<sub>50</sub>s were determined using RF-MS based assay.

|                                                                       | <b>h-cGAS-G108</b>      | <b>h-cGAS-G150</b>      | <b>h-cGAS-cGAMP</b>                      |
|-----------------------------------------------------------------------|-------------------------|-------------------------|------------------------------------------|
| <b>Data collection</b>                                                |                         |                         |                                          |
| Wavelength (Å)                                                        | 0.9792                  | 0.9792                  | 0.9793                                   |
| Space group                                                           | <i>P</i> 6 <sub>4</sub> | <i>P</i> 6 <sub>4</sub> | <i>P</i> 2 <sub>1</sub> 2 <sub>1</sub> 2 |
| Cell dimensions                                                       |                         |                         |                                          |
| <i>a</i> , <i>b</i> , <i>c</i> (Å)                                    | 117.0, 117.0, 60.0      | 116.5, 116.5, 60.0      | 128.0, 50.4, 60.0                        |
| $\alpha$ , $\beta$ , $\gamma$ (°)                                     | 90, 90, 120             | 90, 90, 120             | 90, 90, 90                               |
| Resolution (Å)                                                        | 29.43-2.45 (2.49-2.45)  | 29.35-2.40 (2.44-2.40)  | 29.98-2.60 (2.64-2.60)                   |
| R-pim                                                                 | 2.3 (38.4)              | 2.2 (28.5)              | 4.4 (16.6)                               |
| <i>I</i> / $\sigma$ <i>I</i>                                          | 26.1 (1.5)              | 26.3 (2.4)              | 15.4 (4.5)                               |
| Completeness (%)                                                      | 98.4 (89.6)             | 98.3 (93.2)             | 92.7 (97.9)                              |
| Redundancy                                                            | 9.7 (4.8)               | 9.0 (4.4)               | 3.4 (3.1)                                |
| CC1/2                                                                 | 0.997 (0.582)           | 0.997 (0.737)           | 0.952 (0.949)                            |
| No. reflections                                                       | 17109 (1635)            | 17953 (1719)            | 11586(1186)                              |
| Reflections used for <i>R</i> <sub>free</sub>                         | 1714 (164)              | 1796 (177)              | 1159 (119)                               |
| <b>Refinement</b>                                                     |                         |                         |                                          |
| <i>R</i> <sub>work</sub> / <i>R</i> <sub>free</sub>                   | 22.2/25.6               | 21.3/25.7               | 22.1/26.5                                |
| No. of non-hydrogen atoms                                             |                         |                         |                                          |
| Protein                                                               | 2723                    | 2703                    | 2755                                     |
| Ligand/Ion                                                            | 25                      | 27                      | 46                                       |
| Water                                                                 | 26                      | 45                      | 0                                        |
| <i>B</i> -factors                                                     |                         |                         |                                          |
| Protein                                                               | 81.8                    | 60.9                    | 67.6                                     |
| Ligand/Ion                                                            | 102.0                   | 72.5                    | 74.7                                     |
| Water                                                                 | 60.9                    | 46.3                    |                                          |
| R.m.s. deviations                                                     |                         |                         |                                          |
| Bond lengths (Å)                                                      | 0.003                   | 0.004                   | 0.004                                    |
| Bond angles (°)                                                       | 0.54                    | 0.61                    | 0.60                                     |
| Ramachandran plots                                                    |                         |                         |                                          |
| Favored (%)                                                           | 96.0                    | 96.9                    | 96.6                                     |
| Allowed (%)                                                           | 4.0                     | 2.8                     | 3.4                                      |
| Outliers (%)                                                          | 0                       | 0.3                     | 0                                        |
| Statistics for the highest-resolution shell are shown in parenthesis. |                         |                         |                                          |

**Supplementary Table 3.** X-ray statistics for h-cGAS-inhibitor or h-cGAS-cGAMP complexes.

| <b>Number of compounds</b> | <b>Vendor</b>                                            |
|----------------------------|----------------------------------------------------------|
| 53675                      | AMRI, (Albany, NY)                                       |
| 700                        | Analyticon Discovery, (Potsdam, Germany)                 |
| 10150                      | Biofocus, (Charles River, Wilmington, MA)                |
| 4000                       | Cerep, (Poitiers, France)                                |
| 64477                      | ChemBridge Corporation, (San Diego, CA)                  |
| 23893                      | ChemDiv Inc., (San Diego, CA);                           |
| 1335                       | ChemX-Infinity, (Romainville, France)                    |
| 2094                       | Edelris, (Lyon, France)                                  |
| 81739                      | ENAMINE Ltd., (Monmouth Junction, NJ)                    |
| 240                        | Greenpharma, (Órleans, France)                           |
| 33026                      | Life Chemicals Inc, (Niagara-on-the-Lake, Canada)        |
| 1280                       | Sigma Aldrich, (St. Louis, Missouri)                     |
| 694                        | NIH Clinical Collection, (NIH Small Molecule Repository) |
| 905                        | Pharmakon-900, (MicroSource, Gaylordsville, CT)          |
| 1109                       | Prestwick, (Illkirch, France)                            |
| 808                        | Selleckchem, (Houston, TX)                               |
| 4051                       | Specs, (Zoetermeer, The Netherlands)                     |
| 2000                       | Spectrum Chemicals, (New Brunswick, NJ)                  |
| 480                        | Tocris Bioscience, (Bristol, UK)                         |
| 761                        | Vitas-M Laboratory Ltd., (Kowloon, Hong Kong)            |

**Supplementary Table 4.** High Throughput and Spectroscopy Resource Center at The Rockefeller University library composition.

| <b>Gene</b>   | <b>Species</b> | <b>Forward (5'→3')</b>  | <b>Reverse (5'→3')</b>  |
|---------------|----------------|-------------------------|-------------------------|
| <i>IFNB1</i>  | Human          | GCTTCTCCACTACAGCTCTTTC  | CAGTATTCAAGCCTCCCATTCA  |
| <i>TUBA1B</i> | Human          | ACCTTAACCGCCTTATTAGCCA  | ACATTCAGGGCTCCATCAAATC  |
| <i>Ifnb1</i>  | Mouse          | GATGACGGAGAAGATGCAGAAG  | ACCCAGTGCTGGAGAAATTG    |
| <i>Tuba1a</i> | Mouse          | CCTACAATTCCATCCTCACCAC  | CGCTCAATGTCGAGGTTTCT    |
| <i>CXCL10</i> | Human          | CCATTCTGATTTGCTGCCTTATC | TACTAATGCTGATGCAGGTACAG |
| <i>ISG15</i>  | Human          | CTCATCTTTGCCAGTACAGGAG  | GGGACACCTGGAATTCGTT     |
| <i>TNF</i>    | Human          | CCAGGGACCTCTCTCTAATCA   | TCAGCTTGAGGGTTTGCTAC    |

**Supplementary Table 5.** List of primers used for quantitative RT-PCR.



## Supplementary Methods

### Synthesis of **J014** (4-nitro-*N*-(4-phenylpyridin-2-yl)-1*H*-pyrazole-5-carboxamide)

Illustration of reaction scheme for the synthesis of **J014** is shown in Supplementary Figure 12a. To a solution of 4-nitro-1*H*-pyrazole-3-carboxylic acid (0.013 g, 80  $\mu$ mol) in THF (1 ml) was added DMF (0.062  $\mu$ l, 0.800  $\mu$ mol) and oxalyl chloride (0.014 ml, 160  $\mu$ mol). After being stirred at room temperature for 30 min, the mixture was evaporated by a stream of N<sub>2</sub> gas. 2-Amino-4-phenyl-pyridone (160  $\mu$ mol) in DMA (0.5 ml) and DIEA (0.028 ml, 160  $\mu$ mol) was added to the mixture. The mixture was stirred at room temperature for 3 h. The mixture was poured into water at room temperature and evaporated by a steady air stream at 60°C. The residue was purified by preparative HPLC (YMCTriartC18, eluted with MeCN/0.1%TFA to water/0.1%TFA). The desired fraction was air-dried at 60°C to obtain 4-nitro-*N*-(4-phenylpyridin-2-yl)-1*H*-pyrazole-5-carboxamide (27.23 mg).

**LCMS:** RT = 0.894 min, purity: 98.74%, *m/z* 309.1, 310.1 [MS+H]<sup>+</sup>

**Synthesis of G108** {1-(6,7-dichloro-9-(1*H*-pyrazol-4-yl)-1,3,4,5-tetrahydro-2*H*-pyrido[4,3-*b*]indol-2-yl)-2-hydroxyethan-1-one}.

An illustration of reaction scheme for the synthesis of G108 is shown in Supplementary Figure 12b. To a solution of compound **1** (20 g, 90.30 mmol, 1 eq) in dimethyl formamide (100 ml) was added compound **A** (7.56 g, 32.51 mmol, 0.36 eq) at 25°C. The mixture was stirred for 12 h at 50°C at which point TLC (petroleum ether: ethyl acetate=20:1) showed starting material was consumed and new spot was observed. The

mixture was poured into water (200 ml). The aqueous phase was extracted twice with ethyl acetate (100 ml each). The combined organic phase was washed 3 times with brine (100 ml each), dried over anhydrous sodium sulfate, filtered and concentrated in vacuum. The residue was triturated with petroleum ether (20 ml) at 0°C. The solid was collected by filtration to obtain compound **2** (20 g, 78.15 mmol, 86.54% yield) as a white solid.

**<sup>1</sup>H NMR:** (CDCl<sub>3</sub>, 400 MHz) δ 7.12 (d, *J* = 2.8 Hz, 1H), 7.00 (d, *J* = 2.8 Hz, 1H), 3.79 (s, 3H).

To a mixture of compound **2** (20 g, 78.15 mmol, 1 eq), compound **B** (18.40 g, 93.78 mmol, 1.2 eq), Xantphos (7.45 g, 15.63 mmol, 0.2 eq) and cesium carbonate (63.66 g, 195.37 mmol, 2.5 eq) in toluene (200 ml) was added palladium acetate (1.75 g, 7.81 mmol, 0.1 eq) at 25°C under nitrogen. The mixture was stirred for 10 h at 100°C under nitrogen. LCMS showed the starting material was consumed completely and the desired mass was detected. The mixture was cooled to 30°C and filtered, and the clear liquid was concentrated. The residue was purified by column chromatography (SiO<sub>2</sub>, Petroleum ether = 1) to obtain compound **3** (20 g, 46.71 mmol, 59.77% yield, 86.70% purity) as a yellow solid.

**LCMS:** RT = 1.075 min, purity: 86.70%, *m/z* 371.0, 373.0 [MS+H]<sup>+</sup>

**<sup>1</sup>H NMR:** (CDCl<sub>3</sub>, 400 MHz) δ 8.12 (br. s, 1H), 7.65 - 7.55 (m, 5H), 7.39 - 7.34 (m, 5H), 7.25 (d, *J* = 4.0 Hz, 1H), 6.53 (d, *J* = 4.0 Hz, 1H), 3.86 (s, 3H).

A solution of compound **3** (7 g, 18.85 mmol, 1 eq) in dioxane (60 ml) and hydrochloric acid (12M, 15 ml) was stirred for 1 h at 100°C. TLC (petroleum ether:ethyl acetate, 3:1) showed the starting material was consumed completely and several new spots were observed. The mixture was cooled to 0°C and adjusted to pH 8 by saturated sodium

bicarbonate solution. The aqueous phase was extracted 3 times with ethyl acetate (150 ml each). The combined organic phase was washed with brine (200 ml), dried with anhydrous sodium sulfate, filtered and concentrated in vacuum. The residue was purified by silica gel chromatography (petroleum ether:ethyl acetate=20:1~5:1) to give compound **4** (3 g, 14.32 mmol, 75.96% yield, 98.85% purity) as a yellow solid.

**LCMS:** RT = 0.509 min, purity: 98.845%,  $m/z$  207.0, 208.9 [MS+H]<sup>+</sup>

**<sup>1</sup>H NMR:** (DMSO-*d*<sub>6</sub>, 400 MHz)  $\delta$  6.83 (br. s, 1H), 6.72 (d,  $J$  = 4.0 Hz, 1H), 6.41 (d,  $J$  = 3.2 Hz, 1H), 4.21 (br. s, 2H), 3.73 (s, 3H).

To a solution of compound **4** (6.5 g, 31.39 mmol, 1 *eq*) and ketone **C** (5.11 g, 37.67 mmol, 1.2 *eq*, HCl) in dioxane (70 ml) was added concentrated sulfuric acid (9.02 g, 91.92 mmol, 4.9 ml, 2.93 *eq*) at 0°C. The mixture was stirred for 12 h at 80°C. LCMS showed the starting material was consumed completely and desired compound mass was detected. The mixture was concentrated in vacuum. The residue was diluted with water (20 ml) and adjusted to pH 9 with sodium hydroxide solution (2 M) at 0°C. A precipitate appeared and was collected by filtration to give a crude product. The crude product was triturated with ethyl acetate (15 ml) to give compound **5** (6.5 g, 22.90 mmol, 72.94% yield, 95.51% purity) as a yellow solid.

**LCMS:** RT = 0.648 min, purity: 96.510%,  $m/z$  271.0, 273.0 [MS+H]<sup>+</sup>

**<sup>1</sup>H NMR:** (DMSO-*d*<sub>6</sub>, 400 MHz)  $\delta$  11.64 (br.s, 1H), 6.73 (s, 1H), 4.30 (s, 2H), 3.86 (s, 3H), 3.56 (s, 2H), 2.96 (s, 2H),

To a solution of compound **5** (2 g, 7.05 mmol, 1 *eq*) in dichloromethane (50 ml) was added boron tribromide (5.30 g, 21.16 mmol, 2.04 ml, 3 *eq*) at 0°C. The mixture was stirred at 25°C for 12 h. LCMS showed the desired mass was detected. The mixture was

concentrated in reduced pressure. The residue was poured into saturated sodium bicarbonate solution (30 ml). The aqueous phase was extracted 3 times with ethyl acetate (30 ml each). The combined organic phase was washed with brine (10 ml), dried with anhydrous sodium sulfate, filtered and concentrated in vacuum to obtain compound **6** (1.8 g, 7.0 mmol, 99.24% yield) as a yellow solid.

**<sup>1</sup>H NMR:** (DMSO-*d*<sub>6</sub>, 400 MHz)  $\delta$  11.48 (br. s, 1H), 6.61 (s, 1H), 4.33 (s, 2H), 3.39 - 3.35 (m, 2H), 3.00 - 3.97 (m, 2H).

To a solution of compound **6** (1 g, 3.89 mmol, 1 *eq*) and triethylamine (1.18 g, 11.67 mmol, 1.62 ml, 3 *eq*) in tetrahydrofuran (20 ml) was added Boc<sub>2</sub>O (679.07 mg, 3.11 mmol, 714.81  $\mu$ l, 0.8 *eq*) at 25°C, then the mixture was stirred for 1 h at 25°C. LCMS showed the starting material was consumed completely and the desired mass was detected. The mixture was poured into ice-water (40 ml). The aqueous phase was extracted 3 times with ethyl acetate (20 ml each). The combined organic phase was washed twice with brine (20 ml each), dried with anhydrous sodium sulfate, filtered and concentrated in vacuum. The residue was purified by column chromatography (SiO<sub>2</sub>, Petroleum ether: Ethyl acetate = 10: 1 to 3: 1) to give compound **7** (0.8 g, 2.13 mmol, 54.76% yield, 95.1% purity) as a yellow solid.

**LCMS:** RT = 0.864 min, purity: 95.065%, *m/z* 379.0 [MS+Na]<sup>+</sup>

**<sup>1</sup>H NMR:** (CDCl<sub>3</sub>, 400 MHz)  $\delta$  8.16 (br. s, 1H), 7.90 (br. s, 1H), 6.48 (s, 1H), 4.83 (s, 2H), 3.81 (t, *J* = 6.0 Hz, 2H), 2.85 - 2.81 (m, 2H), 1.59 (s, 9H).

To a solution of compound **7** (700 mg, 1.96 mmol, 1 *eq*) in pyridine (5 ml) and dichloromethane (10 ml) was added Tf<sub>2</sub>O (1.11 g, 3.92 mmol, 646.61  $\mu$ l, 2 *eq*) at 0°C. The mixture was stirred for 1 h at 25°C. LCMS showed the reaction was completed. The

mixture was poured into ice-water (30 ml). The aqueous phase was extracted twice with ethyl acetate (20 ml each). The combined organic phase was washed with hydrochloric acid (1 M, 20 ml) and twice with brine (10 ml each), dried with anhydrous sodium sulfate, filtered and concentrated in vacuum to obtain compound **8** (900 mg, 1.84 mmol, 93.87% yield) as a yellow solid.

**LCMS:** RT = 1.001 min, purity: 89.383%,  $m/z$  432.9, 434.9 [MS-55]<sup>+</sup>

**<sup>1</sup>H NMR:** (CDCl<sub>3</sub>, 400 MHz)  $\delta$  8.43 (br. s, 1H), 7.16 (s, 1H), 4.76 (s, 2H), 3.83 (t,  $J$  = 5.6 Hz, 2H), 2.89 - 2.87 (m, 2H), 1.51 (s, 9H).

To a mixture of compound **8** (200 mg, 408.75  $\mu$ mol, 1 eq), compound **D** (118.97 mg, 613.13  $\mu$ mol, 1.5 eq) and potassium carbonate (169.48 mg, 1.23 mmol, 3 eq) in dioxane (10 ml) and water (3 ml) was added Pd(dppf)Cl<sub>2</sub>.CH<sub>2</sub>Cl<sub>2</sub> (33.38 mg, 40.88  $\mu$ mol, 0.1 eq) at 25°C under nitrogen. The mixture was stirred for 10 h at 80°C. LCMS showed the starting material was consumed completely and the desired mass was detected. The mixture was filtered and the filter was poured into water (20 ml). The aqueous phase was extracted with 3 times with ethyl acetate (15 ml each). The combined organic phase was washed with brine (10 ml), dried with anhydrous sodium sulfate, filtered and concentrated in vacuum. The residue was purified by prep-TLC (SiO<sub>2</sub>, Petroleum ether: Ethyl acetate = 2:1) to obtain compound **9** (150 mg, 362.76  $\mu$ mol, 88.75% yield, 98.5% purity) as a yellow solid.

**LCMS:** RT = 0.850 min, purity: 98.497%,  $m/z$  429.0, 431.0 [MS+Na]<sup>+</sup>

**<sup>1</sup>H NMR:** (CD<sub>3</sub>OD, 400 MHz)  $\delta$  7.75 (s, 1H), 7.60 (s, 1H), 7.00 (s, 1H), 4.24 (s, 2H), 3.75 (s, 2H), 2.85 (t,  $J$  = 5.6 Hz, 2H), 1.20 (s, 9H).

A mixture of compound **9** (150 mg, 368.29  $\mu\text{mol}$ , 1 eq) in trifluoroacetic acid (3 ml) and dichloromethane (10 ml) was stirred for 10 h at 25°C. LCMS showed the reaction was completed. The solution was concentrated in vacuum to obtain compound **10** (120 mg, crude, TFA) as a yellow solid. The crude product was used into the next step without further purification.

**$^1\text{H NMR}$ :** ( $\text{CD}_3\text{OD}$ , 400 MHz)  $\delta$  11.48 (br.s, 1H), 8.01 (br. s, 1H), 7.99 (s, 1H), 7.81 (s, 2H), 7.10 (s, 1H), 4.06 (s, 2H), 3.58 (t,  $J = 6.4$  Hz, 2H), 3.18 (t,  $J = 6.0$  Hz, 2H)

To a solution of compound **10** (120 mg, 390.65  $\mu\text{mol}$ , 1 eq) and triethylamine (118.59 mg, 1.17 mmol, 163.12  $\mu\text{l}$ , 3 eq) in dichloromethane (2 ml) was added compound **E** (80.01 mg, 585.98  $\mu\text{mol}$ , 63.00  $\mu\text{l}$ , 1.5 eq) at 0°C. The mixture was stirred for 0.5 h at 25°C. LCMS showed the starting material was consumed completely and desired mass was detected. The residue was poured into saturated sodium bicarbonate solution (20 ml) and stirred for 15 min. The aqueous phase was extracted 3 times with ethyl acetate (15 ml each). The combined organic phase was washed with brine (10 ml), dried with anhydrous sodium sulfate, filtered and concentrated in vacuum to give compound **11** (150 mg, crude) as a yellow solid which was used into the next step without further purification.

**Preparation of 1-(6,7-dichloro-9-(1H-pyrazol-4-yl)-1,3,4,5-tetrahydro-2H-pyrido[4,3-b]indol-2-yl)-2-hydroxyethan-1-one**

To a solution of compound **11** (150 mg, 368.32  $\mu\text{mol}$ , 1 eq) in tetrahydrofuran (3 ml) and water (1 ml) was added lithium hydroxide monohydrate (46.37 mg, 1.10 mmol, 3 eq) at 25°C. The mixture was stirred for 1 h at 25°C. LCMS showed the starting material was consumed completely and the desired mass was detected. The residue was poured into

ice-water (20 ml) and adjusted to pH 7 by hydrochloric acid (1 M). The aqueous phase was extracted 3 times with ethyl acetate (15 ml each). The combined organic phase was washed twice with brine (10 ml each), dried with anhydrous sodium sulfate, filtered and concentrated in vacuum. The residue was purified by prep-TLC (ethyl acetate:methanol, 20: 1) to obtain **G108** (43 mg, 111.69  $\mu$ mol, 30.32% yield, 94.86% purity) as a yellow solid.

**LCMS:** RT = 1.831 min, purity: 94.864%,  $m/z$  365.0 [MS+H]<sup>+</sup>

**<sup>1</sup>H NMR:** (CD<sub>3</sub>OD, 400 MHz)  $\delta$  7.84 - 7.82 (m, 2H), 7.02 (d,  $J$  = 2.4 Hz, 1H), 4.56 (s, 1H), 4.46 (s, 1H), 4.31 (s, 1H), 4.19 (s, 1H), 4.06 (s, 1H), 3.95 (t,  $J$  = 5.6 Hz, 1H), 3.75 (t,  $J$  = 6.4 Hz, 1H), 2.95 - 2.89 m, 2H)

## Synthesis of G140

### Step 1:

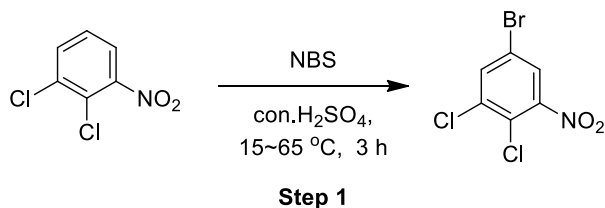

### 5-bromo-1,2-dichloro-3-nitro-benzene

2 reactions were carried out in parallel

To a solution of 1,2-dichloro-3-nitro-benzene (50 g, 260.42 mmol, 1 *eq*) in H<sub>2</sub>SO<sub>4</sub> (200 ml) was added NBS (55.62 g, 312.50 mmol, 1.2 *eq*) at 15 °C. The mixture was stirred at 65 °C for 3 h. The two reaction mixtures were combined. The reaction mixture was poured into ice water (1000 ml) and extracted with EtOAc (100 ml \* 3). The combined organic layers were washed with brine (150 ml), dried over Na<sub>2</sub>SO<sub>4</sub>, filtered and concentrated under reduced pressure to give a crude product 5-bromo-1,2-dichloro-3-nitro-benzene (126.5 g, crude) as a yellow oil.

**<sup>1</sup>H NMR:** ET16671-370-P1A (400MHz, METHANOL-d<sub>4</sub>)

$\delta$  8.07 (d,  $J$  = 2.2 Hz, 1H), 7.81-7.61 (m, 1H)

### Step 2:

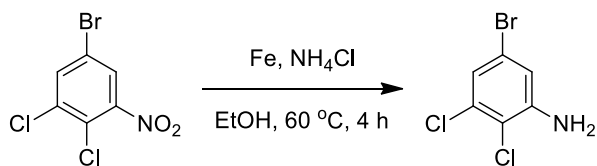

### Step 2

#### 5-bromo-2, 3-dichloro-aniline

To a solution of 5-bromo-1,2-dichloro-3-nitro-benzene (30 g, 110.74 mmol, 1 *eq*) in EtOH (400 ml) was added aq. NH<sub>4</sub>Cl (0.33 M, 610.77 ml, 1.82 *eq*) and Fe (61.85 g, 1.11 mol, 10 *eq*). The mixture was stirred at 60 °C for 4 hr. The reaction mixture was filtered and concentrated under reduced pressure, extracted with EtOAc (50 ml \* 3). The combined organic layers were washed with brine (80 ml), dried over Na<sub>2</sub>SO<sub>4</sub>, filtered and concentrated under reduced pressure to give a residue. The residue was purified by column chromatography (SiO<sub>2</sub>, Petroleum ether) to give 5-bromo-2,3-dichloro-aniline (12 g, 49.81 mmol, 44.98% yield) as a yellow solid.

<sup>1</sup>H NMR: ET16671-363-P1A (400MHz, CHLOROFORM-d)

δ 6.91 (d, *J* = 2.1 Hz, 1H), 6.74 (d, *J* = 2.2 Hz, 1H), 4.32-3.97 (m, 2H)

### Step 3:

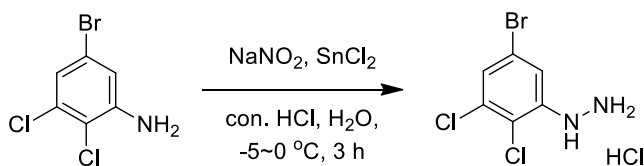

### Step 3

#### (5-bromo-2, 3-dichloro-phenyl)hydrazine

Under a nitrogen atmosphere, a stirred solution of 5-bromo-2,3-dichloro-aniline (40 g, 166.04 mmol, 1 *eq*) in con. HCl (300 ml) was cooled to -5 °C, and a solution of NaNO<sub>2</sub> (17.18 g, 249.05 mmol, 1.5 *eq*) in H<sub>2</sub>O (70 ml) was added drop-wise at a rate to keep the reaction mixture temperature under 0 °C. After the addition the reaction mixture was stirred for an additional 1 h at 0 to -5 °C. Then a solution of SnCl<sub>2</sub>·2H<sub>2</sub>O (93.66 g,



415.09 mmol, 2.5 eq) in con. HCl (300 ml) was added drop-wise at a rate to keep the reaction mixture temperature under -5 to 0 °C. After that, the mixture was stirred at 0 °C for 2 h. The reaction mixture was filtered and the filter cake was washed with MTBE (50 ml), concentrated under reduced pressure to give a compound (5-bromo-2, 3-dichloro-phenyl)hydrazine (28 g, 109.41 mmol, 65.89 % yield) as a yellow solid.

**<sup>1</sup>H NMR:** ET16671-367-P1A1 (400 MHz, DMSO-d6)

δ 7.31-7.21 (m, 2H), 7.00 (d, *J* = 2.32 Hz, 1H), 4.39 (br s, 2H)

**Step 4:**

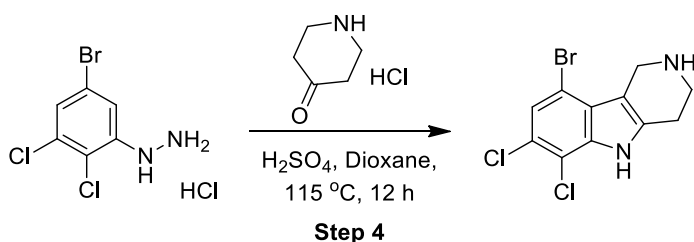

**9-bromo-6, 7-dichloro-2, 3, 4, 5-tetrahydro-1H-pyrido[4,3-b]indole**

To a solution of (5-bromo-2, 3-dichloro-phenyl)hydrazine (27.65 g, 94.57 mmol, 1 eq, HCl) and piperidin-4-one;hydrochloride (19.23 g, 141.85 mmol, 1.5 eq) in dioxane (500 ml) was added H<sub>2</sub>SO<sub>4</sub> (192.09 g, 1.96 mol, 104.39 ml, 20.71 eq). The mixture was stirred at 115 °C for 12 hr. The reaction mixture was concentrated under reduced pressure. The residue was adjusted pH = 8 with NaOH (3 M), filtered and the filter cake was concentrated under reduced pressure to give a residue. The residue was washed with MTBE (50 ml), filtered and the filter cake was concentrated under reduced pressure to give a product 9-bromo-6,7-dichloro-2, 3,4,5-tetrahydro-1H-pyrido[4,3-b]indole (23.6 g, 62.69 mmol, 66.29% yield, 85% purity) as a gray solid.

**<sup>1</sup>H NMR:** ET16671-378-P1A (400 MHz, DMSO-d6)

δ 7.36 (s, 1H), 4.15 (s, 2H), 3.01 (t, *J* = 5.48 Hz, 2H), 2.73-2.66 (m, 2H)

**Step 5:**

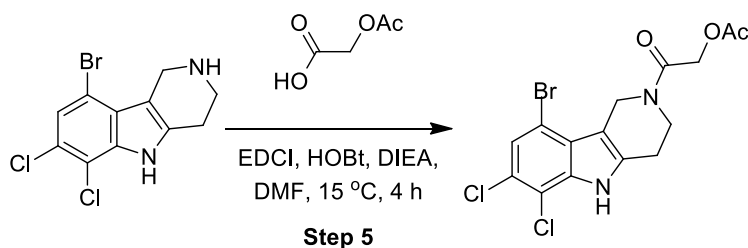

**[2-(9-bromo-6,7-dichloro-1,3,4,5-tetrahydropyrido[4,3-b]indol-2-yl)-2-oxo-ethyl] acetate**

To a solution of 9-bromo-6,7-dichloro-2,3,4,5-tetrahydro-1H-pyrido[4,3-b]indole (1 g, 3.12 mmol, 1 *eq*) and 2-acetoxyacetic acid (442.81 mg, 3.75 mmol, 1.2 *eq*) in DMF (10 ml) was added EDCI (898.56 mg, 4.69 mmol, 1.5 *eq*), HOBT (633.35 mg, 4.69 mmol, 1.5 *eq*) and DIPEA (1.21 g, 9.37 mmol, 1.63 ml, 3 *eq*). The mixture was stirred at 15 °C for 4 h. The reaction mixture was diluted with H<sub>2</sub>O (20 ml) and extracted with EtOAc (20 ml \* 3). The combined organic layers were washed with brine (30 ml), dried over Na<sub>2</sub>SO<sub>4</sub>, filtered and concentrated under reduced pressure to give a residue. The residue was purified by column chromatography (SiO<sub>2</sub>, Petroleum ether/Ethyl acetate = 3/1 to 1/4) to give [2-(9-bromo-6,7-dichloro-1,3,4,5-tetrahydropyrido[4,3-b]indol-2-yl)-2-oxo-ethyl] acetate (0.65 g, 1.41 mmol, 45.06% yield, 91% purity) as a yellow solid.

**<sup>1</sup>H NMR:** ET16671-405-P1A1 (400MHz, DMSO-d<sub>6</sub>)

δ 11.95-11.81 (m, 1H), 7.41 (s, 1H), 4.92-4.81 (m, 4H), 3.84-3.65 (m, 2H), 2.93-2.74 (m, 2H), 2.07 (s, 3H)

**Step 6:**

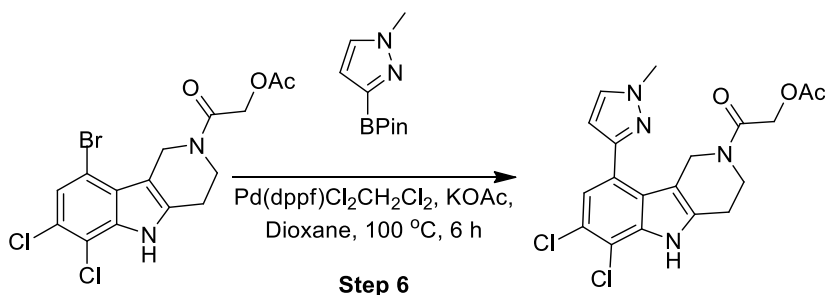

**[2-[6,7-dichloro-9-(1-methylpyrazol-3-yl)-1,3,4,5-tetrahydropyrido[4,3-b]indol-2-yl]-2-oxo-ethyl] acetate**

To a solution of [2-(9-bromo-6,7-dichloro-1,3,4,5-tetrahydropyrido[4,3-b]indol-2-yl)-2-oxo-ethyl] acetate (0.25 g, 595.12  $\mu\text{mol}$ , 1 *eq*) and 1-methyl-3-(4,4,5,5-tetramethyl-1,3,2-dioxaborolane-2-yl)pyrazole (247.65 mg, 1.19 mmol, 2 *eq*) in dioxane (20 ml) was added KOAc (175.21 mg, 1.79 mmol, 3 *eq*) and Pd(dppf)Cl<sub>2</sub>.CH<sub>2</sub>Cl<sub>2</sub> (97.20 mg, 119.02  $\mu\text{mol}$ , 0.2 *eq*). The mixture was stirred at 100 °C for 6 h. The reaction mixture was concentrated under reduced pressure to give a residue. The residue was purified by column chromatography (SiO<sub>2</sub>, DCM/MeOH = 1/0 to 24:1) to give [2-[6,7-dichloro-9-(1-methylpyrazol-3-yl)-1,3,4,5-tetrahydropyrido[4,3-b]indol-2-yl]-2-oxo-ethyl] acetate (0.5 g, crude) as a brown oil.

**<sup>1</sup>H NMR:** ET16671-383-P1B (400 MHz, CHLOROFORM-d)

$\delta$  8.26-8.40 (m, 1H) 7.39-7.30 (m, 2H) 7.20-7.16 (m, 1H) 6.41-6.31 (m, 1H) 4.67 (br s, 1H) 4.57-4.52 (m, 1H) 3.94 (s, 3H) 3.92-3.85 (m, 4H) 2.92-2.78 (m, 3H) 2.15-2.04 (m, 5H)

#### Step 7:

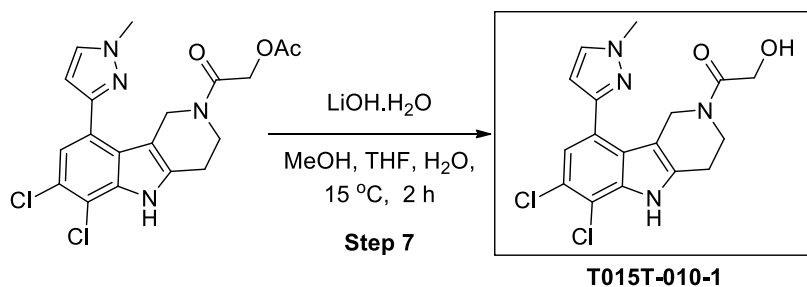

#### 1-[6,7-dichloro-9-(1-methylpyrazol-3-yl)-1,3,4,5-tetrahydropyrido[4,3-b]indol-2-yl]-2-hydroxy-ethanone

To a solution of [2-[6,7-dichloro-9-(1-methylpyrazol-3-yl)-1,3,4,5-tetrahydropyrido[4,3-b]indol-2-yl]-2-oxo-ethyl] acetate (0.5 g, 1.19 mmol, 1 *eq*) in MeOH (10 ml), THF (10 ml) and H<sub>2</sub>O (20 ml) was added LiOH.H<sub>2</sub>O (149.40 mg, 3.56 mmol, 3 *eq*). The mixture was stirred at 15 °C for 2 h. The reaction mixture was diluted with H<sub>2</sub>O (10 ml) and extracted with EtOAc (10 ml \* 3). The combined organic layers were washed with brine (50 ml), dried over Na<sub>2</sub>SO<sub>4</sub>, filtered and concentrated under reduced pressure to give a residue. The residue was purified by prep-HPLC (neutral condition) to give 1-[6,7-

dichloro-9-(1-methylpyr azol-3-yl)-1,3,4,5-tetrahydropyr ido[4,3-b]indol-2-yl]-2-hydroxy-ethanone (0.07 g, 184.58  $\mu\text{mol}$ , 15.55% yield, 100.00% purity) as a white solid.

**LCMS:** ET16671-396-P1A ( $\text{M}+\text{H}^+$ ): 379.0 @ 2.604 min (5-95% ACN in  $\text{H}_2\text{O}$ , 4.5 min)

**$^1\text{H}$  NMR:** ET16671-396-P1A2 (400MHz, DMSO- $\text{d}_6$ )

$\delta$  11.33 (br s, 1H), 7.73 (d,  $J = 2.2$  Hz, 1H), 7.22 (s, 1H), 6.52 (br s, 1H), 4.57 (s, 2H), 4.32 - 4.26 (m, 1H), 4.13 (br s, 2H), 3.94 (s, 3H), 3.76 (br s, 2H), 2.88 (br s, 2H)
