# Supplementary material for: Development of human cGAS-specific small-molecule inhibitors for repression of dsDNA-triggered interferon expression
Source: PubMed Central journal article supplement (PMC6529454; doi:10.1038/s41467-019-08620-4), 2019-05-21
Supplement: 41467_2019_8620_MOESM3_ESM.pdf [file 41467_2019_8620_MOESM3_ESM.pdf]

## **Description of Additional Supplementary Files**

File Name: Supplementary Data 1

Description: DNA intercalation assay results for 100 non-PAIN screening hit compounds showing  $IC_{50} \leq 10 \mu M$  in chemiluminescence (LUM) assay. Powder form for compounds in blue text re-ordered and re-tested using RF-MS assay as shown in Supplementary Table 3.
